# Supplementary material for: NYMPHSTAR: an accurate high-throughput quantitative method for whitefly (Aleurotrachelus socialis Bondar) resistance phenotyping in cassava
Source: Research Square preprint supplement (doi:10.21203/rs.3.rs-1247625/v1), 2022-01-27
Supplement: Supplementary file 1 [file a3943aa76078b36dedf00e7c.xlsx]

## Sheet: Checks #plants_N
Two full-sib cassava families (240 and 198 individuals for each family), segregating for resistance to whitefly were evaluated in eight infestation trials with 176 replications across four years (2013, 2016, 2017 and 2018)
Experiment	Trials/Checks	ECU72	COL1468	COL2246	TMS60444	TME3	PER317	PER368	PER415	PER608	PER335	PER183	COL2182	ECU183	ECU19	ECU41	PAR41	PER226	PER556	PER597
1	2013_CM8996_in vitro_ poor	11	2	2		9
2	2016_GM8586_stakes_poor	43	10	22		17	31	11	8	50
3	2016_CM8996_stakes_poor	17	14	10				19		18	14
4	2017_CM8996_in vitro_ rich	30	27	24	14	14	28	6	5	22	6	3
5	2017_CM8996_stakes_ rich	44	24	48	24	12	12	12	12	12	12
6	2017_GM8586_stakes_ rich	46	23	11	42			12		12	12
7	2018_CM8996_in vitro_ poor	26	20	26	16	29	8		11	18	13	29	19	30	20	20	20	20	4	18
8	2018_GM8586_in vitro_ poor	67	65	40	38		10			24	4	12
	Total N (# plants)	284	185	183	134	81	89	60	36	156	61	44	19	30	20	20	20	20	4	18
